RESEARCH ARTICLE

# Cardiac involvement in patients with primary biliary cholangitis: A 14-year longitudinal survey-based study

Sainan Bian<sup>1,2</sup>, Hua Chen<sup>1,2</sup>, Li Wang<sup>1,2</sup>, Yunyun Fei<sup>1,2</sup>, Yunjiao Yang<sup>1,2</sup>, Linyi Peng<sup>1,2</sup>, Yongzhe Li<sup>1,2</sup>, Fengchun Zhang<sup>1,2\*</sup>

**1** Department of Rheumatology and Clinical Immunology, Peking Union Medical College Hospital, Chinese Academy of Medical Sciences & Peking Union Medical College, Beijing, China, **2** Key Laboratory of Rheumatology & Clinical Immunology, Ministry of Education, Beijing, China

 These authors contributed equally to this work.

\* [zhangfccra@aliyun.com](mailto:zhangfccra@aliyun.com)

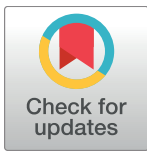

 OPEN ACCESS

**Citation:** Bian S, Chen H, Wang L, Fei Y, Yang Y, Peng L, et al. (2018) Cardiac involvement in patients with primary biliary cholangitis: A 14-year longitudinal survey-based study. PLoS ONE 13(3): e0194397. <https://doi.org/10.1371/journal.pone.0194397>

**Editor:** Gianfranco D. Alpini, Texas A&M University, UNITED STATES

**Received:** September 14, 2017

**Accepted:** March 3, 2018

**Published:** March 15, 2018

**Copyright:** © 2018 Bian et al. This is an open access article distributed under the terms of the [Creative Commons Attribution License](https://creativecommons.org/licenses/by/4.0/), which permits unrestricted use, distribution, and reproduction in any medium, provided the original author and source are credited.

**Data Availability Statement:** All relevant data are within the paper.

**Funding:** This work was supported by the National Natural Science Fund (No. 81571594, <http://www.nsf.gov.cn/>) to FZ, the National Key Research and Development Plan (No. 2016YFA0101003, <http://www.most.gov.cn/>) to FZ, the Youth Program of the Capital Health Development Scientific Research Special Program (No. 2016-4-40111, <http://www.bjchfp.gov.cn/>) to LW, the Youth Program of the National Natural Science Fund (No. 81501414,

## Abstract

Patients with primary biliary cholangitis (PBC) can have extrahepatic manifestations. However, data about cardiac involvement of PBC is limited. We aimed in this study to analyze the clinical characteristics in patients with PBC complicated with and without cardiac involvement, and the risk factors of cardiac involvement in PBC. PBC patients admitted to Peking Union Medical College Hospital between January 2002 and February 2016 were consecutively enrolled. Structured interview, systemic rheumatologic examination, and laboratory tests were conducted for each patient, and risk factors of cardiac involvement were analyzed by comparing patients with and without cardiac involvement. In total, 580 PBC patients were enrolled, and cardiac involvement was identified in 24 patients (4%), with 11 male (46%) and a mean age of 57±8 year. Cardiomyopathy and arrhythmias were presented in 17 (70.8%) and 21 (87.5%) patients, respectively. Patients with cardiac involvement were more frequently male (46% vs. 11%,  $P<0.01$ ), complicated with inflammatory myopathy (IM) (58% vs. 1%,  $P<0.01$ ), and had a longer disease course (median, 72 vs 24 month,  $P<0.01$ ). Furthermore, concomitant IM was the independent risk factor of cardiac involvement in PBC (OR = 77.333, 95% CI: 23.704–252.294). Cardiac involvement was a rare complication of PBC, which was more frequently observed in male or long-course patients. Importantly, concomitant IM was the strong independent risk factor of cardiac involvement in PBC. Given cardiac involvement is a serious complication, thorough evaluation of cardiac manifestation in high-risk PBC patients is highly recommended.

## Introduction

Primary biliary cholangitis (PBC), which was also previously known as primary biliary cirrhosis (PBC), is an autoimmune disease characterized with elevated alkaline phosphatase, positive anti-mitochondrial antibody (AMA), and destruction of small intrahepatic bile ducts in histology. PBC predominantly affects women, and are usually presented in the fifth or sixth decade of life[1].

<http://www.nsf.gov.cn/>) to LW. The funders had no role in the research or assistance with manuscript preparation.

**Competing interests:** The authors have declared that no competing interests exist.

PBC primarily involves the liver, but extrahepatic manifestations are increasingly reported. Among them, interstitial lung disease and pulmonary hypertension are the most prevalent manifestations, with an estimated prevalence of 15.7% and 11.8%, respectively [2, 3]. Cases of nephropathy are also reported [4, 5]. Cardiac involvement, including cardiomyopathy and arrhythmias, such as ventricular tachycardia, and conduction block, is increasingly reported in PBC patients recently [6–10].

Although Cardiac involvement is a critical even fatal complication, limited data are currently available regarding the incidence and clinical features of cardiac involvement in PBC patients. We have observed several PBC cases of severe heart failure in clinical practice, which suggested a possible link between PBC and cardiomyopathy. To address this issue, we employed a large cohort of consecutive PBC patients and analyzed the clinical characteristics of PBC patients with and without cardiac involvement, to identify potential risk factors associated with cardiac involvement. In addition, we reviewed and summarized the cases reported of cardiac involvement in PBC.

## Methods

### Patients

PBC patients who were admitted to Peking Union Medical College Hospital (PUMCH), Beijing, China between January 2002 and February 2016 were enrolled consecutively.

The diagnosis of PBC was made depended on the criteria proposed by American Association for the Study of Liver Diseases: chronic cholestasis with increased serum alkaline phosphatase level and/or  $\gamma$ -glutamyl transpeptidase level; positive anti-mitochondrial antibodies (AMA); histological features in the liver that are indicative of the diagnosis [11, 12]. Other obstructive jaundice diseases were excluded.

A structured interview, systemic rheumatologic examination, and laboratory tests (including liver and renal function, autoantibodies, myocardial enzyme, electrocardiogram, and echocardiography) were performed for each. Clinical data including demographics, clinical manifestation, laboratory evaluation, and liver and myocardium histology (if available) were collected.

Cardiac involvement was defined as presence of cardiomyopathy (left ventricular or biventricular systolic dysfunction) [6, 13, 14] and arrhythmias (mainly ventricular arrhythmia, or conduction defects). Arrhythmias were diagnosed by two cardiologists according to the manifestations of electrocardiogram (ECG) and Holter monitor [15]. In patients with cardiac involvement, contrasted-enhanced coronary artery tomography or angiography were performed to evaluate coronary artery disease (CAD).

In addition, polymyositis (PM) and dermatomyositis (DM) were diagnosed according to the Bohan and Peter criteria [16].

The study was reviewed and approved by the Institutional Review Board of Peking Union Medical College Hospital, and waiver of consent was achieved since the data were analyzed anonymously.

### Statistical analysis

Kolmogorov-Smirnov test was used to check if the variables followed normal distribution. Measurement data of normal distribution were expressed by mean  $\pm$  standard deviation (SD), and measurement data of non-normal distribution were expressed by median and interquartile range (IQR). Enumeration data were expressed by percentage. Continuous and categorical variables were compared using the independent samples t test and Pearson  $\chi^2$  test, respectively. Potential factors associated with cardiac involvement were further evaluated with stepwise

multivariable logistic regression models. A 2-sided p value <0.05 was considered statistically significant. Statistical analysis was performed by SPSS 16.0 (SPSS Inc, Chicago, IL, USA).

## Results

### Baseline demographic data of PBC patients

In total, 580 PBC patients were enrolled, with a mean age of 56±12 year and 88% of female. AMA was positive in 530 patients (91%), and presence of M2 subtype of anti-mitochondrial antibody was observed in 528 patients (91%). Hepatic histology was available in 140 patients (Table 1). Polymyositis (PM) were diagnosed in 14 patients and muscle biopsy was performed in 11 patients.

### Cardiac involvement in PBC

Cardiac involvements were documented in 24 patients (4.1%), including 17 patients (70.8%) with cardiomyopathy, 21 patients (87.5) with arrhythmias, and 14 patients (58.3%) with both cardiomyopathy and arrhythmias. One patient with CAD was excluded from the study.

**Table 1. Demographics, clinical manifestations, and laboratory examinations of PBC patients with or without cardiac involvement.**

| Group                                 | Cardiac involvement (n = 24, 4%) | No cardiac involvement (n = 556, 96%) | P value |
|---------------------------------------|----------------------------------|---------------------------------------|---------|
| Age (yr)                              | 57±8                             | 56±12                                 | 0.621   |
| Female-n (%)                          | 13 (54)                          | 495 (89)                              | <0.01   |
| Concomitant IM-n (%)                  | 14 (58)                          | 7 (1)                                 | <0.01   |
| Disease duration (month)-median (IQR) | 72 (24–120)                      | 24 (6.7–60)                           | <0.01   |
| Autoantibodies                        |                                  |                                       |         |
| AMA-n (%)                             | 22 (92)                          | 508 (91)                              | 0.959   |
| AMA-M2-n (%)                          | 23 (96)                          | 505 (91)                              | 0.401   |
| ACA-n (%)                             | 3 (13)                           | 135 (24)                              | 0.185   |
| Liver function tests                  |                                  |                                       |         |
| Albumin (g/L)                         | 39±5                             | 36±6                                  | 0.060   |
| PT (second, s)                        | 12.2±2.8                         | 12.0±1.6                              | 0.534   |
| ALP (U/L)                             | 178 (153–410)                    | 237 (151–423)                         | 0.388   |
| GGT (U/L)                             | 193 (111–426)                    | 200 (104–424)                         | 0.939   |
| TBil (µmol/L)                         | 16.2 (10.7–24.6)                 | 18.7 (10.8–32.8)                      | 0.307   |
| Cirrhosis-n (%)                       | 5 (20.9)                         | 162 (29.1)                            | 0.379   |
| Hepatic histology-n (%)               | 2 (8.3)                          | 143 (25.7)                            |         |
| PBC I-II                              | 2/2 (100)                        | 115/143 (80.4)                        | 0.486   |
| PBC III-IV                            | 0 /2(0)                          | 28 /143 (19.6)                        | 0.486   |
| IgM (g/L)                             | 3.03 (1.45–4.78)                 | 3.27 (1.88–4.77)                      | 0.708   |
| IgG (g/L)                             | 17.13±6.33                       | 17.41±7.00                            | 0.856   |
| IgA (g/L)                             | 2.47 (1.87–3.32)                 | 3.09 (2.24–4.37)                      | 0.039   |
| ESR (mm/h)                            | 50±27                            | 47±31                                 | 0.618   |
| CRP (mg/L)                            | 4.33 (2.15–9.97)                 | 3.43 (1.47–9.53)                      | 0.429   |
| Hyperlipemia                          | 4 (16.7)                         | 149 (26.8)                            | 0.270   |
| T2DM                                  | 2 (8.3)                          | 77 (13.8)                             | 0.441   |
| Hypertension                          | 9 (37.5)                         | 313 (56.3)                            | 0.070   |
| Overweight or obese                   | 4 (16.7)                         | 63/348 (18.1)                         | 0.859   |

IM: Inflammatory myopathy; AMA: Anti-mitochondrial antibody; AMA-M2: M2 subtype of anti-mitochondrial antibody; ACA: Anti-centromere antibody; PT: Prothrombin time; ALP: Alkaline phosphatase; GGT:  $\gamma$ -glutamyl transpeptidase; TBil: Total bilirubin; IgM: Immunoglobulin M; IgG: Immunoglobulin G; IgA: Immunoglobulin A; ESR: Erythrocyte sedimentation rate, normal range <20mm/h; CRP: C-reactive protein, normal range <3mg/L; T2DM: Type 2 diabetes mellitus.

<https://doi.org/10.1371/journal.pone.0194397.t001>

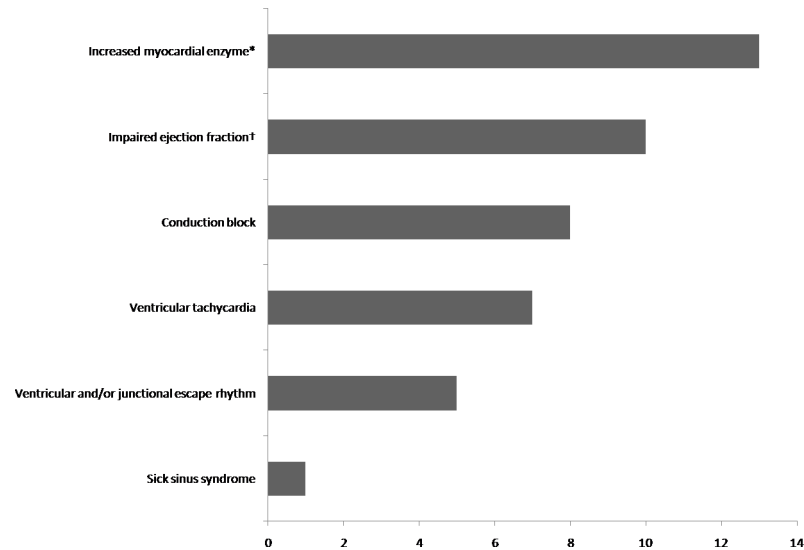

**Fig 1. Cardiac dysfunctions in PBC patients.** \*Performed in 19 patients, defined as CK>198U/L, CKMB>6.3ug/L or cTnI>0.04ug/L. †defined as EF<50%.

<https://doi.org/10.1371/journal.pone.0194397.g001>

Cardiac manifestations were presented simultaneously with PBC in 13 (54%) patients, and presented after PBC in 4 patients (17%) (2 to 6 years). In 7 patients (29%), cardiac manifestations were presented prior to the diagnosis of PBC. Myocardial biopsy of one patient revealed mild degeneration of myocardial tissue and infiltration of lymphocytes.

### Echocardiography

Impaired ejection fraction (EF) (<50%) was observed in 10 patients (41.7%), with a mean EF of  $39 \pm 15\%$ . Whole heart enlargement was observed in 9 patients (37.5%) (Fig 1).

### Myocardial enzyme of PBC patients with cardiac involvement

Among the 24 PBC patients complicated with cardiac involvement, increased myocardial enzyme were observed in 13 out of 19 patients (Fig 1). The median creatine kinase (CK) level was 887 U/L (IQR 384–1181) (normal range 18–198 U/L). The median creatine kinase MB (CKMB) level was 23.8  $\mu$ g/L (IQR 8.9–41.1, range 7.0–199.0) (normal range 0.6–6.3). Median cardiac troponin I (cTnI) was 0.15 (IQR 0.11–0.19, range 0.06–16.73)  $\mu$ g/L (normal range 0–0.04).

### Electrocardiogram (ECG) and Holter monitor

Among the 21 patients with arrhythmias, conduction block ( $n = 8$ , 38.1%), ventricular tachycardia ( $n = 7$ , 33.3%), ventricular and/or junctional escape rhythm ( $n = 5$ , 23.8%), were the most common arrhythmias, followed by sick sinus syndrome in 1 patient (4.8%). Eight patients were complicated with atrial fibrillation and atrial flutter at the same time (Fig 1).

### Comparison of cardiac involvement with non-cardiac involvement in PBC

Patients with cardiac involvement showed male predominance (46% vs 11%,  $P < 0.01$ ), higher incidence of inflammatory myositis (58% vs 1%,  $P < 0.01$ ), longer disease course (72 (24–120) vs 24 (6.7–60) months,  $P < 0.01$ ) and lower level of Immunoglobulin A (IgA) (2.47 (IQR 1.87–3.32) vs 3.09 g/L (IQR 2.24–4.37),  $P = 0.039$ ).

Age, autoantibodies profile and liver function tests were comparable between two groups. A modest trend of higher erythrocyte sedimentation rate (ESR) and C-reactive protein (CRP) in patients with cardiac involvement were noted, but the differences were not statistically significant. Cirrhosis was documented in 5 patients (20.9%) with cardiac involvement and 162 patients (29.1%) without cardiac involvement, respectively. Hepatic histology was available in 2 patients with cardiac involvement and 143 patients without cardiac involvement. Among them, 2 (100%) patients with cardiac involvement and 115 (80.4%) patients without cardiac involvement were at stage of PBC I-II, and 28 patients (19.6%) patients without cardiac involvement were at stage of PBC III-IV (Table 1). No differences on dyslipidemia, type 2 diabetes mellitus, hypertension, and overweight or obesity were observed between two groups (Table 1).

### Risk factors of cardiac involvement in PBC Patients

We further analyzed the potential risk factors associated with cardiac involvement in PBC, including gender, concomitant IM, disease course and IgA. However, multivariate logistic regression analysis showed that concomitant IM was the only independent risk factor related to cardiac involvement in PBC patients ( $P = 0.000$ , odds ratio (OR) = 77.333, 95% confidence interval (CI): 23.704–252.294) (Table 2).

### Outcomes of PBC patients with cardiac involvement

All patients received ursodesoxycholic acid (UDCA). In addition to UCDA treatment, 20 patients with cardiac involvement received high-dose glucocorticoids, including methylprednisolone pulse therapy in 3 patients. Two patients received immunosuppressive agents. 2 patients received pacemakers and 1 patient received radiofrequency ablation. On discharge, the cardiac dysfunction was improved in 19 patients. Eight patients were lost to follow-up, and cardiac condition remained stable for the 16 patients who were followed for a median of 27.0 months (IQR 11.3–49.5). No death was occurred during follow-up period. We are continuously monitoring these patients for long-term outcome.

### Literature review

We also summarized cases reported on Pubmed[6–10]. In total, we found 11 cases reports (Table 3). The mean age was  $52 \pm 9$  year old, and 9 patients (82%) were female. The median disease duration was 5 years (IQR 2–10). Cardiac involvement were developed after PBC in 5 patients (45%)(range 4–10 years), and simultaneously with PBC in 5 patients (45%). All patients presented with arrhythmia, and cardiomyopathy, cardiomegaly, left ventricular hypomotility were presented in 6, 1 and 1 patients, respectively. Strikingly, all patients were complicated with myopathies, including 9 of IM and 2 of myopathy. Myocardium histology was available in 4 patients, which showed interstitial fibrosis in three cases and myositis in one case.

**Table 2. Risk factors of cardiac involvement in PBC patients.**

| Variables      | P value | (OR)   | 95% CI         |
|----------------|---------|--------|----------------|
| Concomitant IM | 0.000   | 77.333 | 23.704–252.294 |

OR: Odds ratio; CI: Confidence interval; IM: Inflammatory myopathy.

<https://doi.org/10.1371/journal.pone.0194397.t002>

Table 3. Literature review of cases of PBC with cardiac involvement.

| References | Publishing date | Country | Age (year)/ Gender | Disease duration (year) | AMA              | Temporal relationship of PBC diagnosis to onset of cardiac involvement <sup>1</sup> | Cardiac manifestations                                | Myocardium histology                                            | Concomitant disease |
|------------|-----------------|---------|--------------------|-------------------------|------------------|-------------------------------------------------------------------------------------|-------------------------------------------------------|-----------------------------------------------------------------|---------------------|
| [7]        | 1992            | Japan   | 42/M               | 5                       | (+)              | Simultaneously                                                                      | AF, SSS, AVB                                          | NA                                                              | PM                  |
| [8]        | 1993            | USA     | 58/F               | 10                      | (+)              | Simultaneously                                                                      | AF, conduction disturbance, congestive cardiomyopathy | Interstitial fibrosis without inflammation                      | Myopathy            |
| [8]        | 1993            | USA     | 44/F               | 13                      | (+)              | -120 months                                                                         | Af, cardiomegaly                                      | Interstitial fibrosis (autopsy)                                 | Myopathy            |
| [9]        | 2007            | Japan   | 37/F               | 5                       | (+)              | +5 months                                                                           | AVPC, left ventricular hypomotility                   | NA                                                              | Chronic myositis    |
| [9]        | 2007            | Japan   | 60/F               | 16                      | (-) <sup>2</sup> | -36 months                                                                          | MVPC, AVB, dilated cardiomyopathy                     | Myositis of heart muscle (autopsy)                              | Chronic myositis    |
| [6]        | 2012            | Japan   | 54/F               | 1                       | (+)              | -84 months                                                                          | Af, cardiomyopathy                                    | NA                                                              | IM                  |
| [6]        | 2012            | Japan   | 49/F               | 2                       | (+)              | Simultaneously                                                                      | AF, PSVT                                              | NA                                                              | IM                  |
| [6]        | 2012            | Japan   | 48/F               | 2                       | (+)              | Simultaneously                                                                      | AVB, cardiomyopathy                                   | NA                                                              | IM                  |
| [6]        | 2012            | Japan   | 54/F               | 2                       | (+)              | -84 months                                                                          | Non-sustained VT, cardiomyopathy                      | NA                                                              | IM                  |
| [6]        | 2012            | Japan   | 59/M               | 5                       | (+)              | Simultaneously                                                                      | Af, cardiomyopathy                                    | NA                                                              | IM                  |
| [10]       | 2012            | Japan   | 65/F               | 5                       | (+)              | -16 months                                                                          | First degree of AVB                                   | Interstitial fibrosis with infiltration of CD3-positive T cells | PM                  |

<sup>1</sup>—PBC diagnosed before onset of cardiac involvement, + PBC diagnosed after onset of cardiac involvement

<sup>2</sup>: Biopsy-proven PBC.

AMA: Anti-mitochondrial antibody; M: Male; AF: Atrial fibrillation; SSS: Sick sinus syndrome; AVB: Atrioventricular block; NA: Not available; PM: Polymyositis; F: Female; Af: Atrial flutter; AVPC: Atrial and ventricular premature contractions; MVPC: Multifocal ventricular premature contraction; PSVT: Paroxysmal supraventricular tachycardia; VT: Ventricular tachycardia.

<https://doi.org/10.1371/journal.pone.0194397.t003>

## Discussion

In this study, we investigated a large PBC cohort to characterize the clinical features and risk factors of cardiac involvement in patients with PBC. We showed cardiac involvement was a rare complication of PBC, which presented in 4% of PBC patients. PBC patients with cardiac involvement were predominantly males, with longer disease course, and frequently complicated with IM.

PBC is dominated in female (92%) [1], however, in our study, 46% of patients with cardiac involvement were male, which is much higher than PBC patients without cardiac involvement (11%). Although male gender is implicated as a risk factor of cardiac involvement in PBC, it was not confirmed in multivariate analysis. In contrast, most patients (82%) were female in the literature review. Nevertheless, our data suggested evaluation of cardiac involvement in male patients of PBC is necessary, especially in high-risk patients. Similarly, Jones DE's study suggest left ventricular ejection time was impaired in PBC compared with healthy controls [17]. Newton JL's study also found that symptoms of cardiovascular autonomic dysfunction were significantly more frequently reported and significantly more severe in PBC patients than in matched normal controls [18, 19]. However, hepatic function was comparable in the groups of patients in our study. Patients with cardiac involvement have much longer course (72 (24–120) vs 24 (6.7–60) month,  $P < 0.01$ ). Similarly, Maeda, M.H. et al also found that chronic disease courses were more frequently observed in AMA-positive IM patients than in AMA-negative IM patients [6]. Although it was not confirmed as a risk factor in multivariate analysis, for

long-course PBC with suspected cardiac manifestations, a systemic cardiac evaluation is still warranted.

In our study, PBC patients with cardiac involvement presented more frequently with IM. And multivariate analysis also showed that it was a strong independent risk factor of cardiac involvement ( $P < 0.01$ , OR 77.333, 95%CI 23.704–252.294). Literature review of the 11 cases were also all complicated with myopathies. Interestingly, in a 212-case cohort of IM, 7 patients were complicated with PBC, and cardiac involvement was found in five patients (71.4%). While among the 205 IM patients without PBC, only three (1.46%) had cardiac involvement ( $P < 0.01$ ) [6], which implicated that patients with concomitant PBC and IM were at high risk of developing cardiac involvement. The authors suggest that AMA is not only the markers of PBC but also the factors involved in pathogenic mechanisms. Further study is needed to elucidate the role of AMAs in the pathogenesis of cardiac involvement.

The mechanism of cardiac involvement in PBC remains elusive. In addition to periductal infiltration of lymphocytes, mainly CD4 and CD8 T cells [6], lymphocytes infiltration was also observed in skeletal muscles as well as myocardial tissue in one patient's myocardial biopsy. And Varga et al. proposed that cardiomyopathy might be one of the types of muscle involvement in PBC [8]. Granulomatous inflammation with bile duct injury is a characteristic liver histopathological feature of PBC, which is also observed in other organs including skin [20] and lung [21]. Interestingly, Maeda, M.H. et al show granulomatous inflammation in muscle histopathology [6], which implicate that granulomatous inflammation might present in myocardial tissues of PBC. Further studies of myocardial histology might clarify this point. Moreover, autoantibodies of PBC play a potential role in the pathogenesis. The anti-mitochondrial antibody potentially disturbs cardiac energy metabolism by inhibition of nucleotide transport, and induce cytotoxic effect by cross-reacting with a  $\text{Ca}^{2+}$  channel protein [10].

Our study has several limitations. First, given myocardium biopsy is an invasive procedure, it was performed in only one patient and the cardiac histological data was largely incomplete, which might underestimate the prevalence of cardiomyopathy. Second, this study is a single-center study conducted in a national referral center of complex diseases, and consequently the cohort might not be representative of patients in general centers. Third, as this is a retrospective study, long-term prognosis and survival was unavailable.

## Conclusions

We reported a large cohort of PBC patients, and observed cardiac involvement in about 4% of patients. Patients with cardiac involvement were more frequently male, complicated with inflammatory myopathy, and had a longer disease course. Furthermore, concomitant IM was the strong independent risk factor of cardiac involvement in PBC. Given cardiac involvement is a serious complication, thorough evaluation of cardiac manifestation in high-risk PBC patients is highly recommended.

## Author Contributions

**Conceptualization:** Fengchun Zhang.

**Data curation:** Sainan Bian, Hua Chen, Li Wang, Yunyun Fei, Yunjiao Yang, Linyi Peng, Yongzhe Li, Fengchun Zhang.

**Formal analysis:** Sainan Bian, Hua Chen, Fengchun Zhang.

**Funding acquisition:** Li Wang, Fengchun Zhang.

**Supervision:** Fengchun Zhang.

**Validation:** Fengchun Zhang.

**Writing – original draft:** Sainan Bian, Hua Chen.

**Writing – review & editing:** Hua Chen, Li Wang, Yunyun Fei, Yunjiao Yang, Linyi Peng, Yongzhe Li, Fengchun Zhang.

## References

1. Carey EJ, Ali AH, Lindor KD. Primary biliary cirrhosis. *Lancet*. 2015; 386(10003):1565–75. [https://doi.org/10.1016/S0140-6736\(15\)00154-3](https://doi.org/10.1016/S0140-6736(15)00154-3) PMID: 26364546.
2. Shen M, Zhang F, Zhang X. Primary biliary cirrhosis complicated with interstitial lung disease: a prospective study in 178 patients. *Journal of clinical gastroenterology*. 2009; 43(7):676–9. <https://doi.org/10.1097/MCG.0b013e31818aa11e> PMID: 19247207.
3. Shen M, Zhang F, Zhang X. Pulmonary hypertension in primary biliary cirrhosis: a prospective study in 178 patients. *Scandinavian journal of gastroenterology*. 2009; 44(2):219–23. <https://doi.org/10.1080/00365520802400883> PMID: 18821172.
4. Moreno-Otero R, Trapero-Marugan M. Extrahepatic conditions associated with primary biliary cirrhosis. *Hepatology*. 2010; 51(2):713. <https://doi.org/10.1002/hep.23231> PMID: 19918979.
5. Sakamaki Y, Hayashi M, Wakino S, Fukuda S, Konishi K, Hashiguchi A, et al. A case of membranous nephropathy with primary biliary cirrhosis and cyclosporine-induced remission. *Internal medicine*. 2011; 50(3):233–8. PMID: 21297326.
6. Maeda MH, Tsuji S, Shimizu J. Inflammatory myopathies associated with anti-mitochondrial antibodies. *Brain: a journal of neurology*. 2012; 135(Pt 6):1767–77. <https://doi.org/10.1093/brain/aws106> PMID: 22561642.
7. Harada N, Dohmen K, Itoh H, Ohshima T, Yamamoto H, Nagano M, et al. Sibling cases of primary biliary cirrhosis associated with polymyositis, vasculitis and Hashimoto's thyroiditis. *Internal medicine*. 1992; 31(2):289–93. PMID: 1600281.
8. Varga J, Heiman-Patterson T, Munoz S, Love LA. Myopathy with mitochondrial alterations in patients with primary biliary cirrhosis and antimitochondrial antibodies. *Arthritis Rheum*. 1993; 36(10):1468–75. PMID: 8216406.
9. Tanaka K, Sato A, Kasuga K, Kanazawa M, Yanagawa K, Umeda M, et al. Chronic myositis with cardiomyopathy and respiratory failure associated with mild form of organ-specific autoimmune diseases. *Clinical rheumatology*. 2007; 26(11):1917–9. <https://doi.org/10.1007/s10067-007-0698-7> PMID: 17674117.
10. Matsumoto K, Tanaka H, Yamana S, Kaneko A, Tsuji T, Ryo K, et al. Successful steroid therapy for heart failure due to myocarditis associated with primary biliary cirrhosis. *The Canadian journal of cardiology*. 2012; 28(4):515 e3–6. <https://doi.org/10.1016/j.cjca.2011.12.010> PMID: 22366508.
11. Heathcote EJ. Management of primary biliary cirrhosis. *The American Association for the Study of Liver Diseases practice guidelines*. *Hepatology*. 2000; 31(4):1005–13. <https://doi.org/10.1053/he.2000.5984> PMID: 10733559.
12. Lindor KD, Gershwin ME, Poupon R, Kaplan M, Bergasa NV, Heathcote EJ, et al. Primary biliary cirrhosis. *Hepatology*. 2009; 50(1):291–308. <https://doi.org/10.1002/hep.22906> PMID: 19554543.
13. Wang L, Zhang FC, Chen H, Zhang X, Xu D, Li YZ, et al. Connective tissue diseases in primary biliary cirrhosis: a population-based cohort study. *World journal of gastroenterology*. 2013; 19(31):5131–7. <https://doi.org/10.3748/wjg.v19.i31.5131> PMID: 23964148; PubMed Central PMCID: PMC3746386.
14. Pinto YM, Elliott PM, Arbustini E, Adler Y, Anastasakis A, Bohm M, et al. Proposal for a revised definition of dilated cardiomyopathy, hypokinetic non-dilated cardiomyopathy, and its implications for clinical practice: a position statement of the ESC working group on myocardial and pericardial diseases. *European heart journal*. 2016; 37(23):1850–8. <https://doi.org/10.1093/eurheartj/ehv727> PMID: 26792875.
15. Jaeger FJ. Cleveland Clinic 2014. Available from: [www.clevelandclinicmeded.com/medicalpubs/diseasemanagement/cardiology/cardiacarrhythmias](http://www.clevelandclinicmeded.com/medicalpubs/diseasemanagement/cardiology/cardiacarrhythmias).
16. Bohan A, Peter JB. Polymyositis and dermatomyositis (first of two parts). *N Engl J Med*. 1975; 292(7):344–7. <https://doi.org/10.1056/NEJM197502132920706> PMID: 1090839.
17. Jones DE, Hollingsworth K, Fattakhova G, MacGowan G, Taylor R, Blamire A, et al. Impaired cardiovascular function in primary biliary cirrhosis. *American journal of physiology Gastrointestinal and liver physiology*. 2010; 298(5):G764–73. <https://doi.org/10.1152/ajpgi.00501.2009> PMID: 20133949; PubMed Central PMCID: PMC2867424.



18. Newton JL, Hudson M, Tachtatzis P, Sutcliffe K, Pairman J, Burt JA, et al. Population prevalence and symptom associations of autonomic dysfunction in primary biliary cirrhosis. *Hepatology*. 2007; 45(6):1496–505. <https://doi.org/10.1002/hep.21609> PMID: 17538969.
19. Newton JL, Allen J, Kerr S, Jones DE. Reduced heart rate variability and baroreflex sensitivity in primary biliary cirrhosis. *Liver international: official journal of the International Association for the Study of the Liver*. 2006; 26(2):197–202. <https://doi.org/10.1111/j.1478-3231.2005.01214.x> PMID: 16448458.
20. Kishor S, Turner ML, Borg BB, Kleiner DE, Cowen EW. Cutaneous sarcoidosis and primary biliary cirrhosis: A chance association or related diseases? *Journal of the American Academy of Dermatology*. 2008; 58(2):326–35. <https://doi.org/10.1016/j.jaad.2007.07.031> PMID: 18222332.
21. Fagan EA, Moore-Gillon JC, Turner-Warwick M. Multiorgan granulomas and mitochondrial antibodies. *N Engl J Med*. 1983; 308(10):572–5. <https://doi.org/10.1056/NEJM198303103081006> PMID: 6828082.
